# Supplementary material
Source: PubMed Central journal article supplement (PMC5800967)
Supplement: NIHMS908514-supplement-2.pdf [file NIHMS908514-supplement-2.pdf]

# (A)

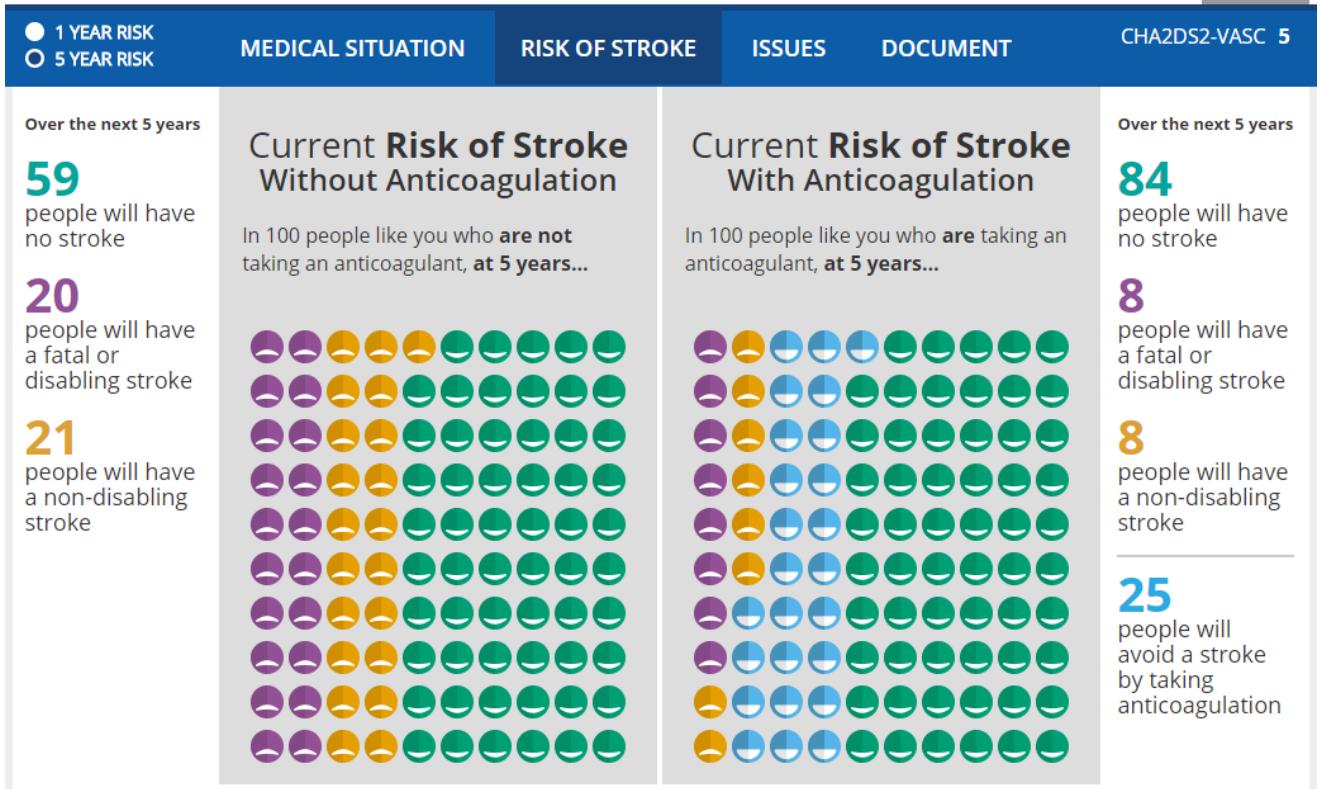

# (B)

● 1 YEAR RISK  
○ 5 YEAR RISK

MEDICAL SITUATION RISK OF STROKE ISSUES DOCUMENT

CHA2DS2-VASC 5

**Bleeding**

**Anticoagulation Routine**

**Reversing Anticoagulation**

**Cost**

**Diet & Medication Interaction**

**Diet & Medication**

**Warfarin** *Coumadin* ++++

Requires a consistent diet

Interacts with common foods, medications, and supplements

**Direct Anticoagulants** +

Few interactions with food or medications

Can you maintain the consistent diet that Warfarin requires?

**Anticoagulation Options**

**Warfarin** *Coumadin*

**Direct Anticoagulants**

|             |                |
|-------------|----------------|
| Apixaban    | <i>Eliquis</i> |
| Dabigatran  | <i>Pradaxa</i> |
| Edoxaban    | <i>Savaysa</i> |
| Rivaroxaban | <i>Xarelto</i> |

Anticoagulation affects your life in differing ways. Which issue would you like to discuss first?
