# Supplementary material
Source: PubMed Central journal article supplement (PMC5800967)
Supplement: NIHMS908514-supplement-6.pdf [file NIHMS908514-supplement-6.pdf]

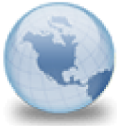

RE: Permission question - CJC-D-17-00903R2

Noseworthy, Peter A., M.D.

A :

Hess, Erik P., M.D., 'Marc P', Jennifer Anne Bacchi

2017-09-18 13:34

Masquer les détails

De : "Noseworthy, Peter A., M.D." <Noseworthy.Peter@mayo.edu>

A : "Hess, Erik P., M.D." <Hess.Erik@mayo.edu>, 'Marc P' <mprobst@gmail.com>,

Jennifer Anne Bacchi <JenniferAnne.Bacchi@icm-mhi.org>

Historique : Ce message a fait l'objet d'une réponse.

Looks good – thank you!

---

**From:** Hess, Erik P., M.D.

**Sent:** Monday, September 18, 2017 12:34 PM

**To:** 'Marc P'; Jennifer Anne Bacchi

**Cc:** Noseworthy, Peter A., M.D.

**Subject:** RE: Permission question - CJC-D-17-00903R2

Seems reasonable to me.

**From:** Marc P [<mailto:mprobst@gmail.com>]

**Sent:** Monday, September 18, 2017 12:33 PM

**To:** Jennifer Anne Bacchi

**Cc:** Noseworthy, Peter A., M.D.; Hess, Erik P., M.D.

**Subject:** Re: Permission question - CJC-D-17-00903R2

Yes, certainly we can do that. I have CC'd the co-authors, Erik and Peter, for them to fill in and confirm.

This is my understanding how to proceed, but please let me know if this is incorrect.

**Appendix C:**

My decision aid "SynDA" is not yet published, but is copyrighted.

So it should say "Reproduced with permission of Marc Probst. ©2016 Mount Sinai School of Medicine."

**Appendix B:**

For the AF decision aid, it is copyrighted by Mayo

So it should say "Reproduced with permission of Peter Noseworthy. © 1998-2017 Mayo Foundation for Medical Education and Research."

**Appendix B:**

For the Chest Pain decision aid, it is copyrighted by Mayo

So it should say "Reproduced with permission of Erik Hess. © [Dates, Erik?] Mayo Foundation for Medical Education and Research."

Thanks in advance,

-Marc

On Fri, Sep 15, 2017 at 1:40 PM, Jennifer Anne Bacchi <[JenniferAnne.Bacchi@icm-mhi.org](mailto:JenniferAnne.Bacchi@icm-mhi.org)> wrote:

Dear Dr Probst,

See e-mail exchange below concerning permission for your supplementary figures.

Can you provide an e-mail or formal paperwork?

Thanks in advance,  
Jennifer

Jennifer Bacchi  
Editorial Manager, Canadian Journal of Cardiology  
Administrative Assistant for Dr. Stanley Nattel

Montreal Heart Institute  
5000 Bélanger St. E.  
Montreal, Quebec  
Canada H1T 1C8

T: [514-376-3330](tel:514-376-3330) ext 3587

De : "Smith, Mariellen (ELS-PHI)" <[Mariellen.Smith@elsevier.com](mailto:Mariellen.Smith@elsevier.com)>  
A : Jennifer Anne Bacchi <[JenniferAnne.Bacchi@icm-mhi.org](mailto:JenniferAnne.Bacchi@icm-mhi.org)>  
Date : 2017-09-13 16:45  
Objet : RE: Permission question - CJC-D-17-00903R2

---

That would be preferable, even if it were just an email from the authors saying they are reusing their own figures which is allowed by that journal. We still need to have the line that says "Reproduced with permission of xxx". If I don't see any permission paperwork, I'll request it from the author, so this saves me a step.

**Mariellen Smith**  
Journal Manager  
**ELSEVIER** | Global Journals Production, North America  
[+1 \(215\) 239 3390](tel:+12152393390) phone

**From:** Jennifer Anne Bacchi [<mailto:JenniferAnne.Bacchi@icm-mhi.org>]  
**Sent:** Wednesday, September 13, 2017 8:36 AM  
**To:** Smith, Mariellen (ELS-PHI)  
**Subject:** RE: Permission question - CJC-D-17-00903R2

**\*\*\* External email: use caution \*\*\***

Do you need documentation to prove that?

Jennifer Bacchi  
Editorial Manager, Canadian Journal of Cardiology  
Administrative Assistant for Dr. Stanley Nattel

Montreal Heart Institute  
5000 Bélanger St. E.  
Montreal, Quebec  
Canada H1T 1C8

T: [514-376-3330](tel:514-376-3330) ext 3587

De : "Smith, Mariellen (ELS-PHI)" <[Mariellen.Smith@elsevier.com](mailto:Mariellen.Smith@elsevier.com)>  
A : Jennifer Anne Bacchi <[JenniferAnne.Bacchi@icm-mhi.org](mailto:JenniferAnne.Bacchi@icm-mhi.org)>  
Date : 2017-09-12 17:06  
Objet : RE: Permission question - CJC-D-17-00903R2

---

If those journals allow authors to reuse their own figures, it's fine.

**Mariellen Smith**  
Journal Manager  
**ELSEVIER** | Global Journals Production, North America  
[+1 \(215\) 239 3390](tel:+12152393390) phone

**From:** Jennifer Anne Bacchi [<mailto:JenniferAnne.Bacchi@icm-mhi.org>]  
**Sent:** Tuesday, September 12, 2017 11:11 AM  
**To:** Smith, Mariellen (ELS-PHI)  
**Subject:** Permission question - CJC-D-17-00903R2

**\*\*\* External email: use caution \*\*\***

Hi Mariellen,

In a previous decision letter, I asked the author to provide permission for their 3 supplementary material documents (see attached).

In the response to reviewers, the author replied

**The three images in the supplementary material are our own, since we are the creators of these three decision aids (Marc Probst for syncope, Erik Hess for chest pain, and Peter Noseworthy for atrial fibrillation). Thus, no outside permission should be needed.**

What do you think?

Let me know,  
Jennifer

Jennifer Bacchi  
Editorial Manager, Canadian Journal of Cardiology  
Administrative Assistant for Dr. Stanley Nattel

Montreal Heart Institute  
5000 Bélanger St. E.  
Montreal, Quebec  
Canada H1T 1C8

T: [514-376-3330 ext 3587](tel:514-376-3330)

--

Marc Probst, MD, MS  
Assistant Professor  
Department of Emergency Medicine  
Mount Sinai Medical Center  
New York, NY  
Cell: 310-666-3834  
Office: 212-824-8094
